# Supplementary material
Source: publisher site journal article supplement (https://static.cambridge.org/content/id/urn:cambridge.org:id:article:S1041610218001679/resource/name/S1041610218001679supp001.docx)
Supplement: Supplementary file 1 [file S1041610218001679supp001.docx]

This supplementary file (word, 17KB) summarizes the search strategy used in the systematic review.
